# Supplementary material for: No Evidence for AID/MBD4-Coupled DNA Demethylation in Zebrafish Embryos
Source: PubMed Central journal article supplement (PMC4275248; doi:10.1371/journal.pone.0114816), 2014-12-23
Supplement: pone.0114816.s007.pdf [file pone.0114816.s007.pdf]

Table S1 – Primers and PCR conditions for bisulfite genomic sequencing, quantitative RT-PCR, and RACE

| Gene            | Figures                          | Primer sequences                    | PCR conditions                      | CpGs   | Product |
|-----------------|----------------------------------|-------------------------------------|-------------------------------------|--------|---------|
| M-DNA           | 1A                               | ATGGAAGACGCCAAAAACATAA              | 95°C, 10 m:(94°C, 30 s: 55°C, 30 s: |        | 736 bp  |
|                 |                                  | CGTGATGGAATGGAACAACA                | 72°C, 30 s)×38 cycles: 72°C, 7 m    |        |         |
| M-DNA           | 2A                               | GATGTAAAAATATAAAGAAAGGT             | 95°C, 10 m:(94°C, 30 s: 54°C, 30 s: | 4      | 718 bp  |
|                 |                                  | AAACAACACTTAAATCACAATAT             | 72°C, 1 m)×40 cycles: 72°C, 7 m     |        |         |
| SINE3-1a        | 2B                               | TTTAATTTGTGGTTTGTGTGAGTTT           | 95°C, 10 m:(94°C, 30 s: 55°C, 30 s: | 15     | 350 bp  |
|                 |                                  | CCACCAATATACAACATCCACTTAA           | 72°C, 30 s)×25 cycles: 72°C, 7 m    |        |         |
|                 | AAGGGGATATTATATTGTTAGTGGG (nest) | 95°C, 10 m:(94°C, 30 s: 55°C, 30 s: | 7                                   | 148 bp |         |
|                 | ATAAAAAAACTTTAACAAAAACACC (nest) | 72°C, 30 s)×25 cycles: 72°C, 7 m    |                                     |        |         |
| DANA            | 2B                               | TAATATAAAAAATAAAATAAAATAAATTTTG     | 95°C, 10 m:(94°C, 30 s: 50°C, 30 s: | 18     | 469 bp  |
|                 |                                  | CACCAAAATATTTC AATACTTTCT           | 72°C, 1 m)×35 cycles: 72°C, 7 m     |        |         |
| <i>flila</i>    | 2B                               | GTTTTTAATGGGTTTTGTATATTT            | 95°C, 10 m:(94°C, 30 s: 55°C, 30 s: | 11     | 292 bp  |
|                 |                                  | CTCACAAAAC TACTATTATCAACATAACTA     | 72°C, 30 s)×35 cycles: 72°C, 7 m    |        |         |
| <i>runx1</i>    | 2B                               | TTTTTGGGGG TTAGGAGAG TAT            | 95°C, 10 m:(94°C, 30 s: 50°C, 30 s: | 14     | 210 bp  |
|                 |                                  | CCCATATAAAAACAAATCTAATACCTTAAA      | 72°C, 1 m)×40 cycles: 72°C, 7 m     |        |         |
| 5S rRNA         | 2B                               | TTTGGTAGTTGATTTAAATAGTTAA           | 95°C, 10 m:(94°C, 30 s: 53°C, 30 s: | 7      | 160 bp  |
|                 |                                  | CTTACAACACCTAATATTCCCAAAC           | 72°C, 30 s)×40 cycles: 72°C, 7 m    |        |         |
| KenoDr1         | 2B                               | GGTTTGTATTGAATTATTGGT               | 95°C, 10 m:(94°C, 30 s: 55°C, 30 s: | 16     | 282 bp  |
|                 |                                  | AAATCATTTTCCTTAAAAATCA              | 72°C, 30 s)×40 cycles: 72°C, 7 m    |        |         |
| LINE-1          | 2B                               | GGTTGGAGATGGTTTATTTT                | 95°C, 10 m:(94°C, 30 s: 55°C, 30 s: | 50     | 551 bp  |
|                 |                                  | TTCCTAAACCACAAATATAAACAT            | 72°C, 30 s)×33 cycles: 72°C, 7 m    |        |         |
| <i>aid</i>      | 3A, 5C                           | TCAGATTCTGCAGCCTTGC                 | 95°C, 30s:(94°C, 5 s: 59°C, 20 s)   |        | 136 bp  |
|                 |                                  | CAGCACCATTTCTCTTCATCC               | ×40 cycles                          |        |         |
| <i>apobec2a</i> | 3A                               | CACAACGCACCCAAGTGA                  | 95°C, 30s:(94°C, 5 s: 59°C, 20 s)   |        | 227 bp  |
|                 |                                  | CCTGTGATGGTCTCGAATG                 | ×40 cycles                          |        |         |
| <i>apobec2b</i> | 3A                               | ATGGCAGACAAAAAGGACAG                | 95°C, 30s:(94°C, 5 s: 59°C, 20 s)   |        | 287 bp  |
|                 |                                  | CGGTCTCCTACAATGATCTC                | ×40 cycles                          |        |         |
| <i>mbd4</i>     | 3A                               | AAGAGACGCTTCCATGA                   | 95°C, 30s:(94°C, 5 s: 59°C, 20 s)   |        | 340 bp  |
|                 |                                  | TTATGATCGTCTGGAGTGAC                | ×40 cycles                          |        |         |
| <i>gadd45a</i>  | 3B                               | CGCTTAATGTGGACCCAGAC                | 95°C, 30s:(94°C, 5 s: 59°C, 20 s)   |        | 80 bp   |
|                 |                                  | CTGGAGGGCCACATCTTTTA                | ×40 cycles                          |        |         |

|                 |        |                                             |                                                                         |    |          |        |
|-----------------|--------|---------------------------------------------|-------------------------------------------------------------------------|----|----------|--------|
| <i>gadd45al</i> | 3B     | CTCGGTGATTAAGGCTCTGG                        | 95°C, 30s:(94°C, 5 s: 59°C, 20 s)<br>×40 cycles                         |    | 110 bp   |        |
|                 |        | CGTTATCAGGGTCCACATTG                        |                                                                         |    |          |        |
| <i>gadd45b</i>  | 3B     | CCTCGTCACTAACTCTCAATGC                      | 95°C, 30s:(94°C, 5 s: 59°C, 20 s)<br>×40 cycles                         |    | 134 bp   |        |
|                 |        | CGCGAATAGTTCAGCGTTCT                        |                                                                         |    |          |        |
| <i>gadd45bl</i> | 3B     | GCACTGAGAGAAAAATGGAGAC                      | 95°C, 30s:(94°C, 5 s: 59°C, 20 s)<br>×40 cycles                         |    | 128 bp   |        |
|                 |        | GCTGTCTGGATCCACATTCA                        |                                                                         |    |          |        |
| <i>gadd45g</i>  | 3B     | ACTACTGGCGATAGAATGCAG                       | 95°C, 30s:(94°C, 5 s: 59°C, 20 s)<br>×40 cycles                         |    | 129 bp   |        |
|                 |        | GCTGTCTGGGTCAACATTCA                        |                                                                         |    |          |        |
| <i>gadd45gl</i> | 3B     | TGCTTATCACGAAACCTGCT                        | 95°C, 30s:(94°C, 5 s: 59°C, 20 s)<br>×40 cycles                         |    | 116 bp   |        |
|                 |        | GGGCAGAGTGATCTCAGGAA                        |                                                                         |    |          |        |
| <i>mbd4</i>     | 4B,C,D | AAGAGACGCTCTTCCATGA                         | 95°C, 10 m:(94°C, 30 s: 55°C, 30 s:<br>72°C, 30 s)×40 cycles: 72°C, 7 m |    | 340 bp   |        |
|                 | S1(A)  | TTATGATCGTCTGGAGTGAC                        |                                                                         |    |          |        |
| <i>aid</i>      | 5B     | AGTGTGCTCATGACCCAGA                         | 95°C, 10 m:(94°C, 30 s: 65°C, 30 s:<br>72°C, 30 s)×40 cycles: 72°C, 7 m |    | 200 bp   |        |
|                 |        | CACAACGCACCCAAGTGA                          |                                                                         |    |          |        |
| <i>EF1a1</i>    | 5D     | TGCAGACTTTGTGACCTTGC                        | 98°C, 30 s:(98°C, 5 s: 67°C, 10 s:<br>72°C, 1 m)×25 cycles: 72°C, 7 m   |    | 1,439 bp |        |
| <i>neurod2</i>  |        | GTTTTTAAATAGGTATAGGT                        | 95°C, 10 m:(94°C, 30 s: 54°C, 30 s:<br>72°C, 1 m)×40 cycles: 72°C, 7 m  | 19 | 460 bp   |        |
|                 |        | CAAACAAAATTACATACCTA                        |                                                                         |    |          |        |
|                 |        | AGGTATAGGTTAGGTTATGT (nest)                 | 72°C, 30 s)×35 cycles: 72°C, 7 m                                        |    | 43       | 438 bp |
|                 |        | CATACCTACTCTTATACCAAAA (nest)               |                                                                         |    |          |        |
| <i>sox1a</i>    | 6A,B   | TTTTGTTTAAAAAGGATAAGTAT                     | 95°C, 10 m:(94°C, 30 s: 50°C, 30 s:<br>72°C, 1 m)×35 cycles: 72°C, 7 m  | 43 | 555 bp   |        |
|                 | S2     | AATACATACTAATCATCTCT                        |                                                                         |    |          |        |
|                 |        | GTTAGAGGTTGGAGAGTTT (nest)                  | 95°C, 10 m:(94°C, 30 s: 55°C, 30 s:<br>72°C, 30 s)×35 cycles: 72°C, 7 m |    | 459 bp   |        |
|                 |        | TAATCATCTCTCTCAAATCTC (nest)                |                                                                         |    |          |        |
| <i>atoh1a</i>   |        | AAAGATTGTTGGGGTAAT                          | 95°C, 10 m:(94°C, 30 s: 50°C, 30 s:<br>72°C, 1 m)×35 cycles: 72°C, 7 m  | 13 | 405 bp   |        |
|                 |        | AATTATTATACCCAACTCTA                        |                                                                         |    |          |        |
| <i>mbd4</i>     | S1(A)  | ACTGGTCTTGCGCTTCTCTACAGTCTCTCAG<br>(5'RACE) | (94°C, 5 s: 65°C, 10 s: 72°C, 3 m)<br>×28 cycles                        |    | ~1.9 kb  |        |
|                 |        | GCTGGAGAAGAGATGAGGCAGAAACTC<br>(3'RACE)     | 95°C, 10 m:(94°C, 30 s: 66°C, 30 s:<br>72°C, 1 m)×40 cycles: 72°C, 7 m  |    | ~750 bp  |        |
| <i>mbd4</i>     | S1(B)  | TGTTCTAACCCGCTTCTGCT                        | 95°C, 10 m:(94°C, 30 s: 55°C, 30 s:<br>72°C, 30 s)×40 cycles: 72°C, 7 m |    | multiple |        |
|                 |        | TTTCTCCGCTCTCTTCTTC                         |                                                                         |    |          |        |

|               |      |                          |                                                 |  |        |
|---------------|------|--------------------------|-------------------------------------------------|--|--------|
| <i>rpl13a</i> | 3A,B | TCTGGAGGACTGTAAGAGGTATGC | 95°C, 30s:(94°C, 5 s: 59°C, 20 s)<br>×40 cycles |  | 148 bp |
|               | 5C   | AGACGCACAATCTTGAGAGCAG   |                                                 |  |        |
